# Supplementary material
Source: PubMed Central journal article supplement (PMC3150193)
Supplement: NIHMS312756-supplement-Supplementary_Materials.pdf [file NIHMS312756-supplement-Supplementary_Materials.pdf]

## CORRECTION NOTICE

*Nat. Neurosci.* **14**, 387–397 (2011)

### An optogenetic toolbox designed for primates

Ilka Diester, Matthew T Kaufman, Murtaza Mogri, Ramin Pashaie, Werapong Goo, Ofer Yizhar, Charu Ramakrishnan, Karl Deisseroth & Krishna V Shenoy

In the version of this supplementary file originally posted online, two tables were missing. The error has been corrected in this file as of 25 February 2011.

## **SUPPLEMENTARY MATERIAL**

### **An Optogenetic Toolbox Designed for Primates**

Ilka Diester, Matthew T. Kaufman, Murtaza Mogri,  
Ramin Pashaie, Werapong Goo, Ofer Yizhar, Charu Ramakrishnan,  
Karl Deisseroth, Krishna V. Shenoy

Correspondence should be addressed to  
K.S. (shenoy@stanford.edu) or K.D. (deissero@stanford.edu)

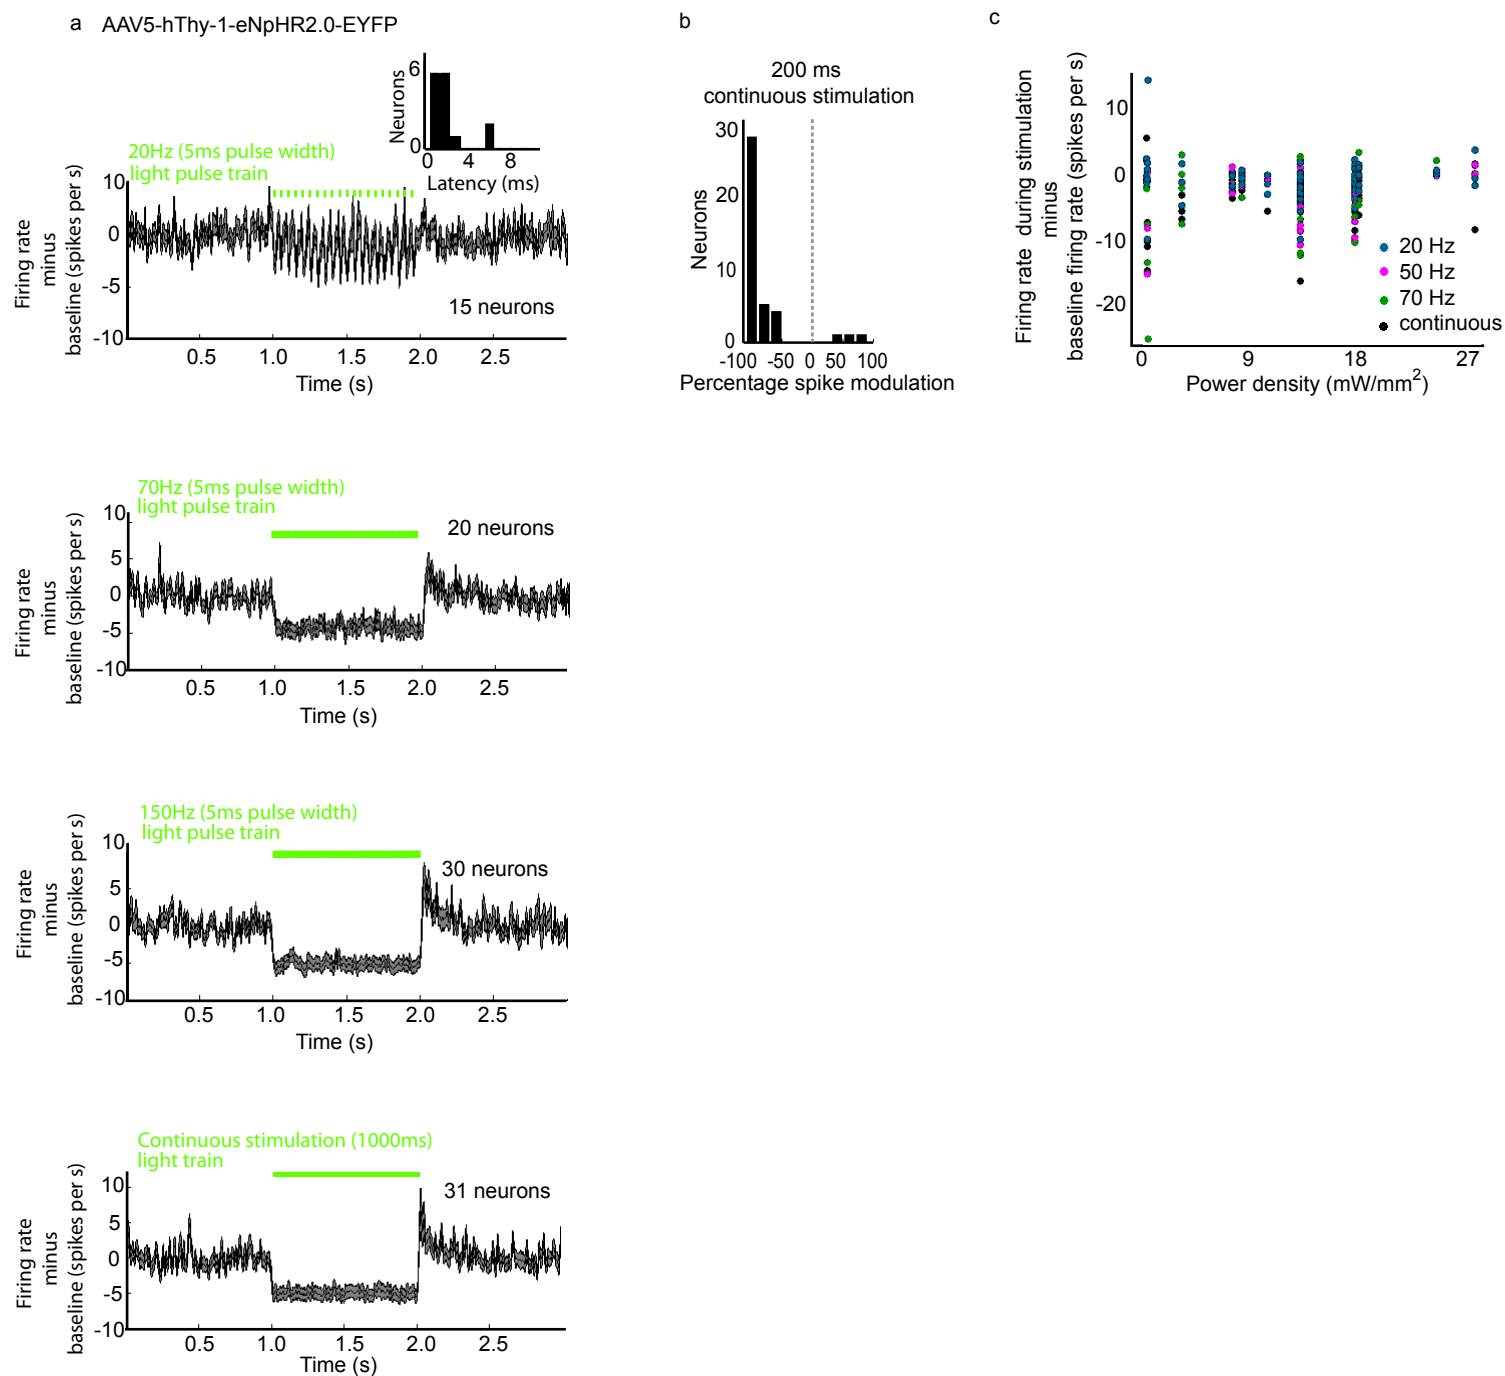

**Supplementary Figure 1.** Average neuronal population responses to light, spike modulation, and applied light intensities at the eNpHR2.0 expressing site. **(a)** Population PSTHs (baseline subtracted average  $\pm$  SEM) of significantly modulated neurons during optical stimulation. Inset in 20 Hz panel shows the latency distribution measured during 20 Hz stimulation of significantly light responsive neurons. **(b)** Spike modulations of significantly light-responsive neurons measured during 200 ms continuous stimulation for neurons. **(c)** Applied light intensities. The differences between baseline firing rate and firing rate during optical stimulation are plotted against the applied power densities. Each dot represents a neuron-stimulation protocol combination. Different colors represent different stimulation parameters: blue - 20Hz, magenta - 50 Hz, green - 70 Hz, black - continuous stimulation. Power densities causing neural modulation at the recording sites ranged from  $0.34 \text{ mW}/\text{mm}^2$  to  $27 \text{ mW}/\text{mm}^2$ .

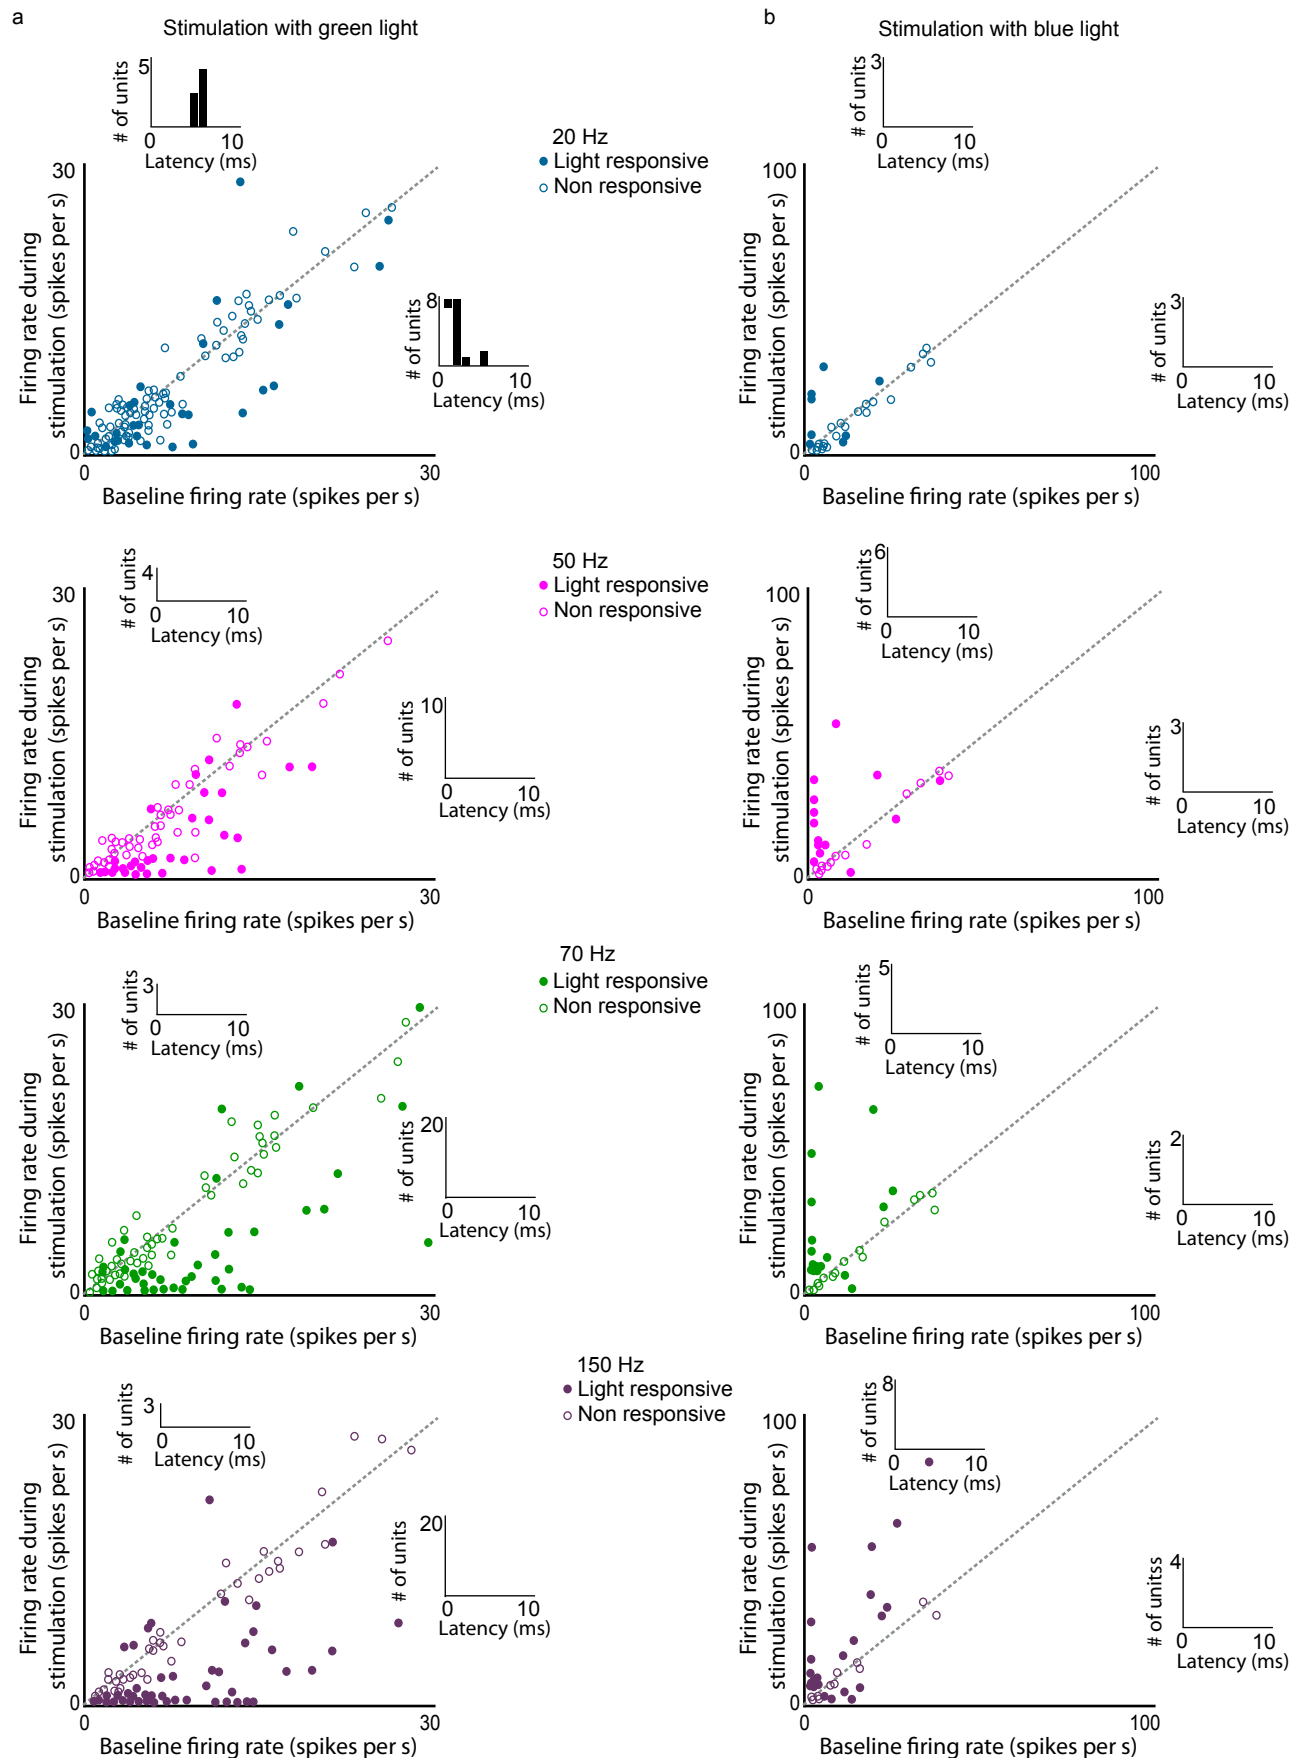

**Supplementary Figure 2.** Firing rate modulation of single and multi units caused by green and blue light recorded at an eNpHR2.0 expressing site. **(a)** Responses and latencies during green light stimulation. Firing rates during stimulation are plotted against baseline firing rates (without stimulation). Empty circles show non-significant responses to light, filled circles show significant responses. Note that not all units were tested with the full set of frequencies. The dashed gray line is the unity-slope line. Insets depict latency distribution of units which responded with an increase of their firing rate during stimulation (dots above the gray dashed line) or with a decrease of their firing rate during stimulation (dots beneath the gray dashed line). **(b)** Responses and latencies during blue light stimulation. Same layout as in a.

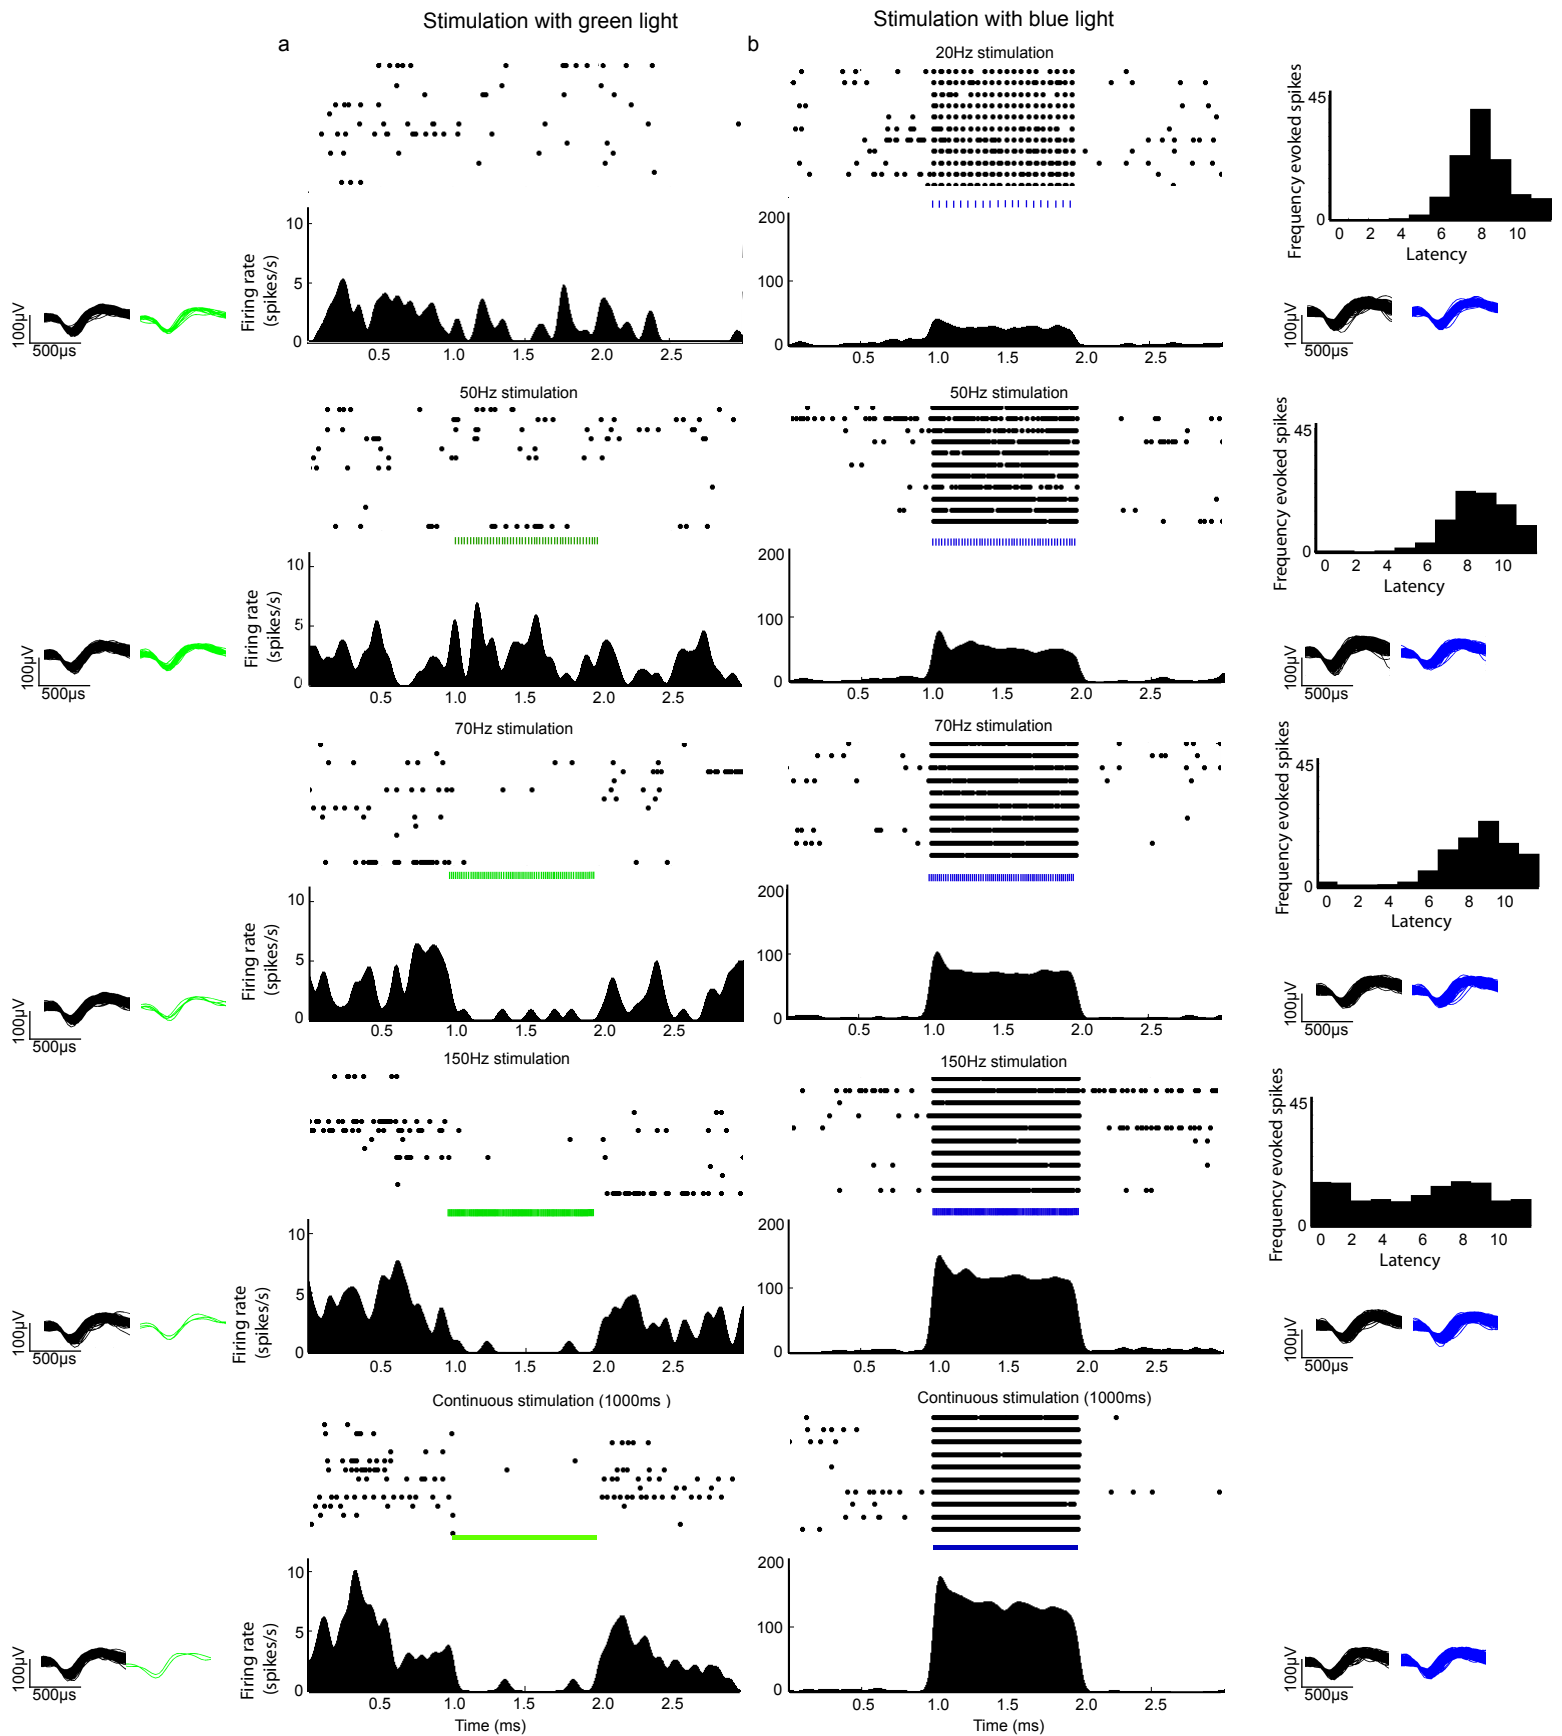

**Supplementary Figure 3.** Opposing effects of green and blue light on a neuron at an eNpHR2.0 expressing site. The neuron responds with a decreased firing rate during green light stimulation (**a**) and an increase of firing rate during blue light stimulation (**b**). Please note the prolonged latencies for blue light stimulation which argue for an indirect network effect most likely caused by ChR2-expressing axons originating in the ChR2-injected sites.

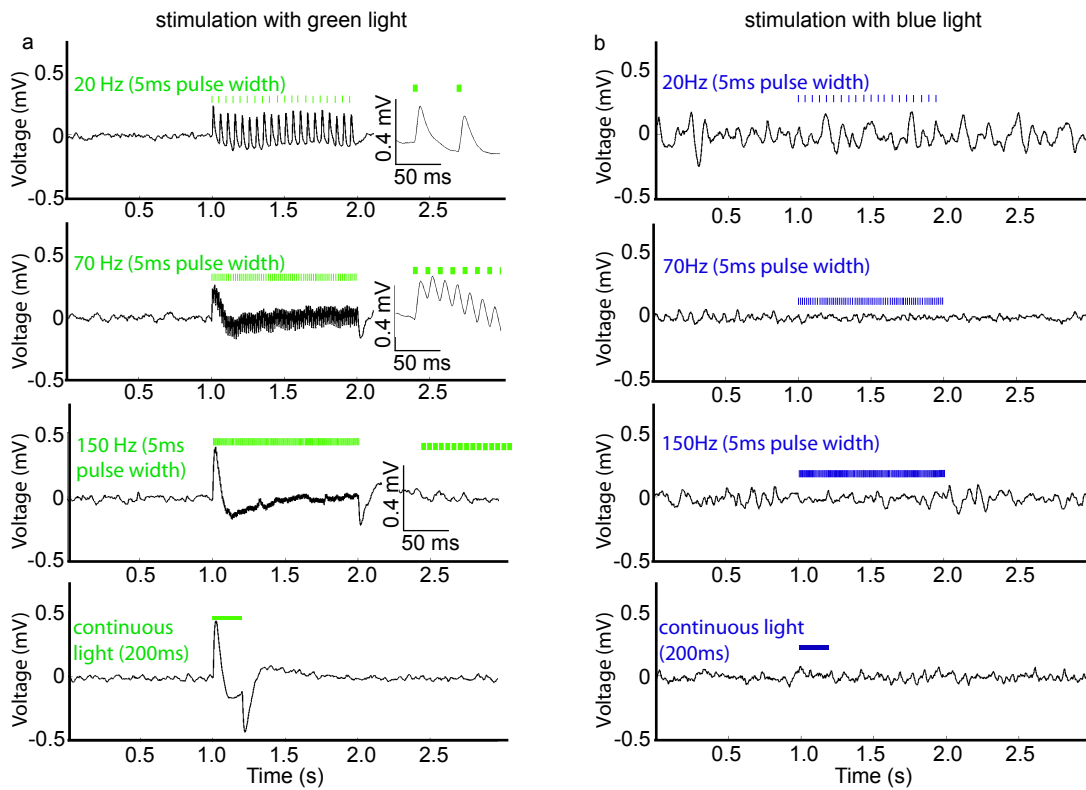

**Supplementary Figure 4.** Local field potential deflections in eNpHR2.0-expressing regions during optical stimulation. **(a)** Local field potential deflections (averaged across 5 to 10 trials) in response to green light with increasing frequencies from top to bottom (20, 70, 150 Hz and 200 ms continuous stimulation). Deflections are positive and show a negative rebound effect after the end of stimulation (particularly obvious for 200 ms continuous light). The direction of the deflection is as expected based on the ion flow:  $\text{Cl}^-$  is pumped into neurons, causing a relative increase of positive charges (positive deflections of the LFP signal) in the extracellular milieu. Insets depict an expanded view of the averaged LFP traces. **(b)** Measurements during blue light stimulation at the same area as in a. No prominent LFP deflections are visible.

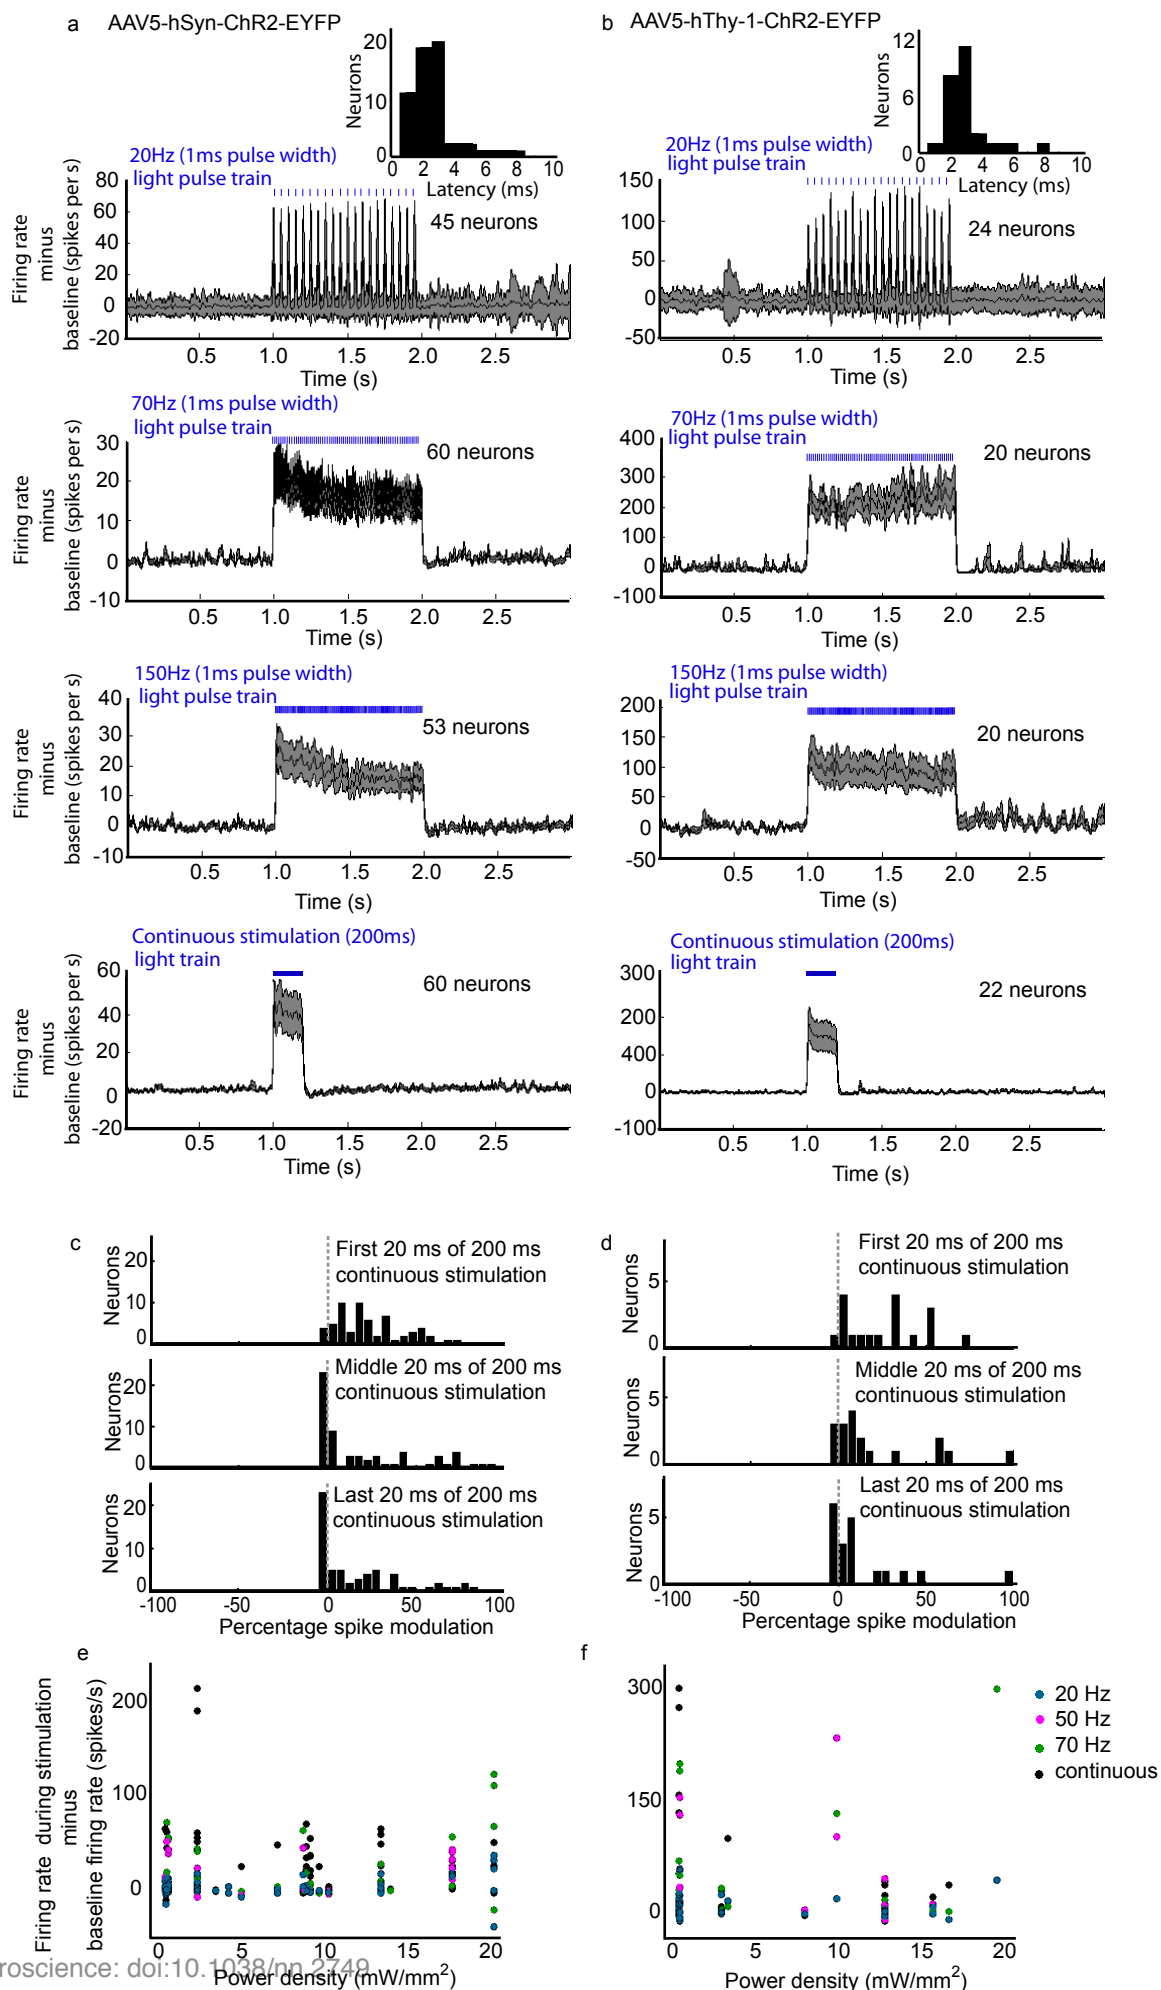

**Supplementary Figure 5.** Average neuronal population responses to light and spike modulation. **(a,b)** Population PSTHs (baseline subtracted average  $\pm$  SEM) of significantly modulated neurons during optical stimulation. Inset in 20 Hz panel shows the latency distribution measured during 20 Hz stimulation of significantly light responsive neurons. **(a)** AAV5-hSyn-ChR2-EYFP, **(b)** AAV5-hThy-1-ChR2-EYFP. **(c,d)** Spike modulations of significantly light-responsive neurons measured during 200 ms continuous stimulation for neurons. **(c)** AAV5-hSyn-ChR2-EYFP, **(d)** AAV5-hThy-1-ChR2-EYFP. Separate distributions are plotted for the first, middle, and last 20 ms following light onset to show the dynamic response properties. **(e,f)** Applied light intensities. The differences between baseline firing rate and firing rate during optical stimulation are plotted against the applied power densities. Each dot represents a neuron-stimulation protocol combination. Different colors represent different stimulation parameters: blue - 20Hz, magenta - 50 Hz, green - 70 Hz, black - continuous stimulation. Power densities causing neural modulation at the recording sites ranged from 0.25 mW/mm<sup>2</sup> to 20 mW/mm<sup>2</sup>. **(e)** AAV5-hSyn-ChR2-EYFP, **(f)** AAV5-hThy-1-ChR2-EYFP.

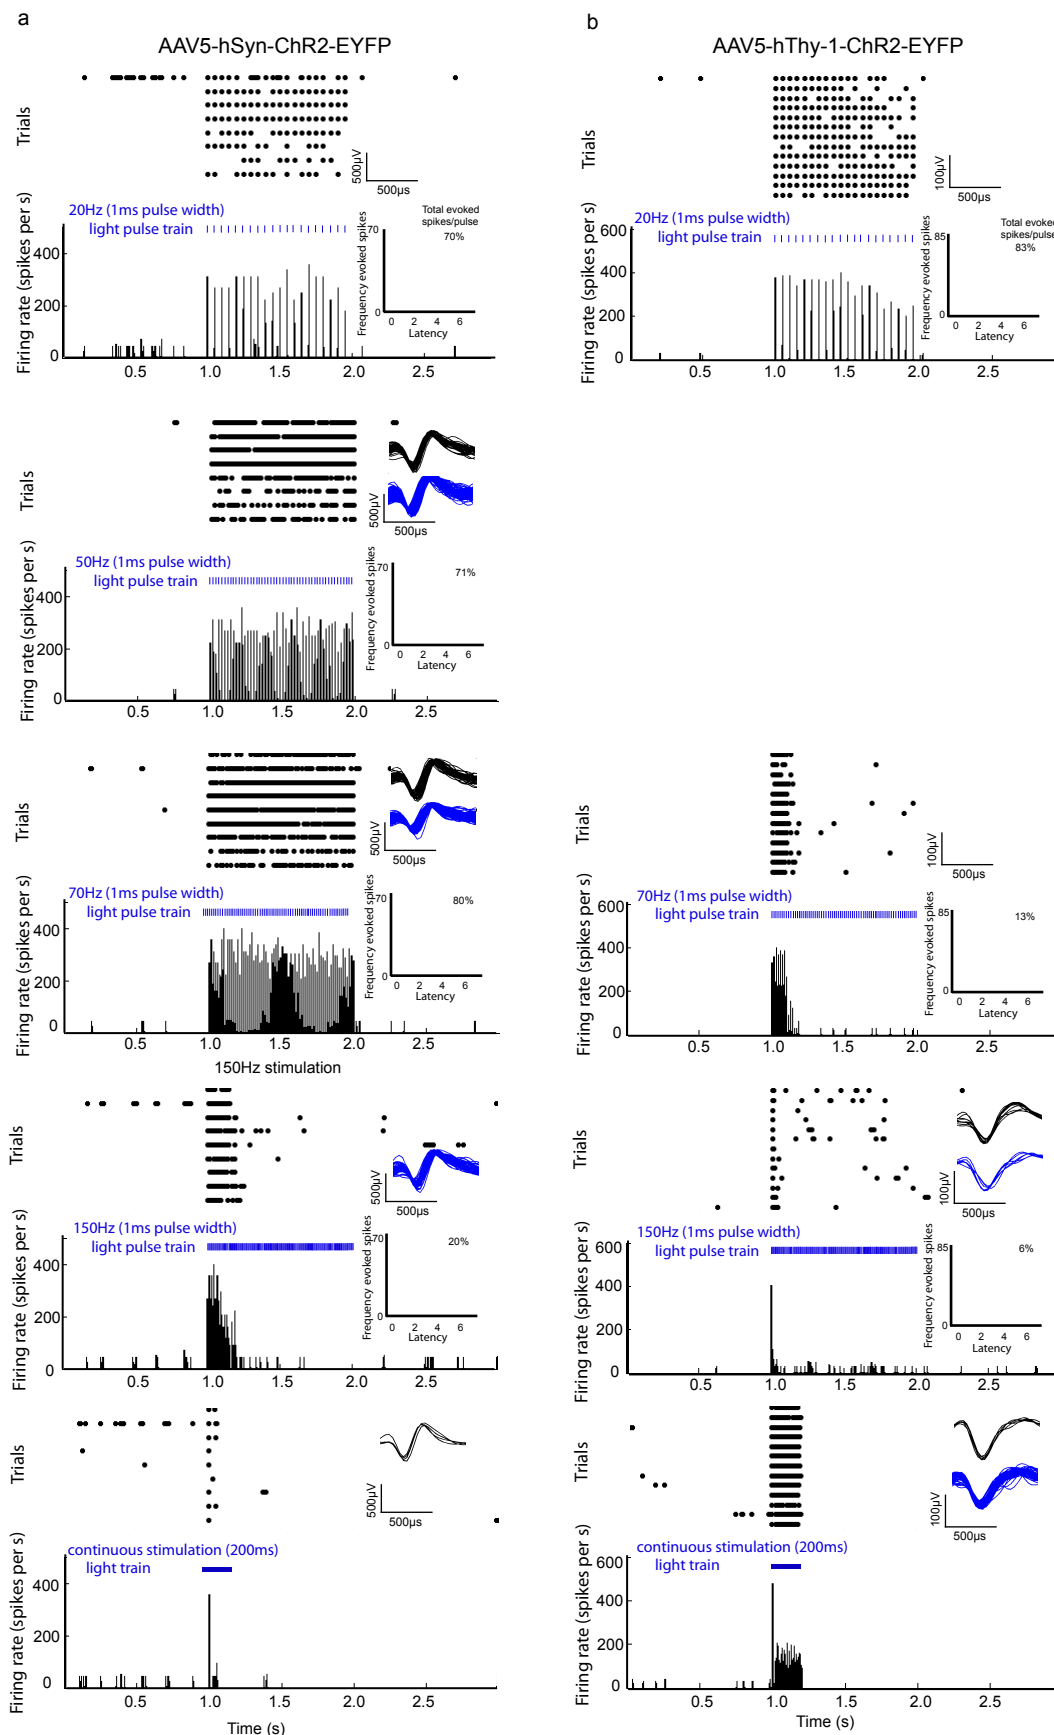

**Supplementary Figure 6.** Raster plots and PSTHs of neurons recorded at ChR2-expressing sites. **(a)** AAV5-hSyn-ChR2-EYFP and **(b)** AAV5-hThy-1-ChR2-EYFP. Boxes represent responses to 20, 50, 70, 150 Hz and continuous blue light stimulation. Blue ticks represent blue light stimulation. The pulse-triggered average is plotted with 1 ms resolution illustrating the latency of the excitation after the light pulse and light-evoked waveforms (blue) did not differ from spontaneous waveforms (black) (see insets).

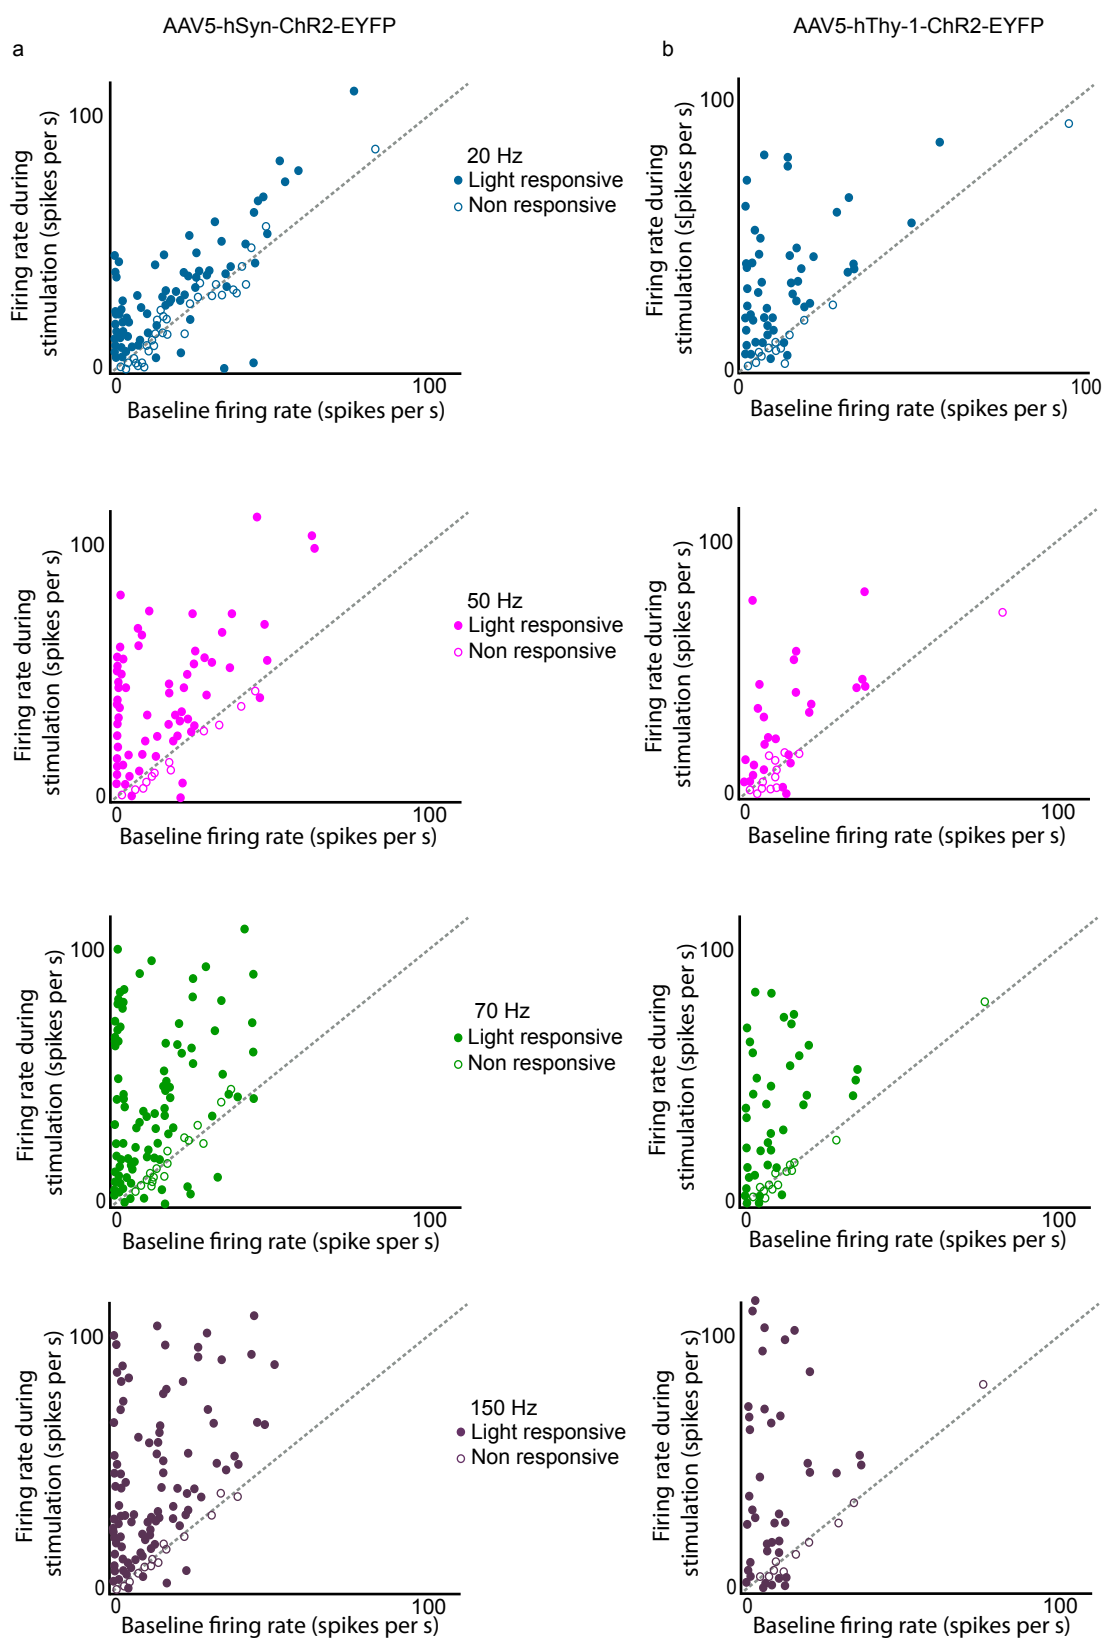

**Supplementary Figure 7.** Firing rate modulation of single and multi units recorded at ChR2 expressing sites. (a) AAV5-hSyn-ChR2-EYFP and (b) AAV5-hThy-1-ChR2-EYFP. Firing rates during stimulation are plotted against baseline firing rates (without stimulation). Empty circles show non-significant responses to light, filled circles show significant responses. Different colors represent different stimulation parameters (shown in separate panels): blue - 20Hz, magenta - 50 Hz, green - 70 Hz, violet - 150 Hz. Note that not all units were tested with the full set of frequencies. The dashed gray line is the unity-slope line, where baseline firing rate and stimulation firing rate are equal.

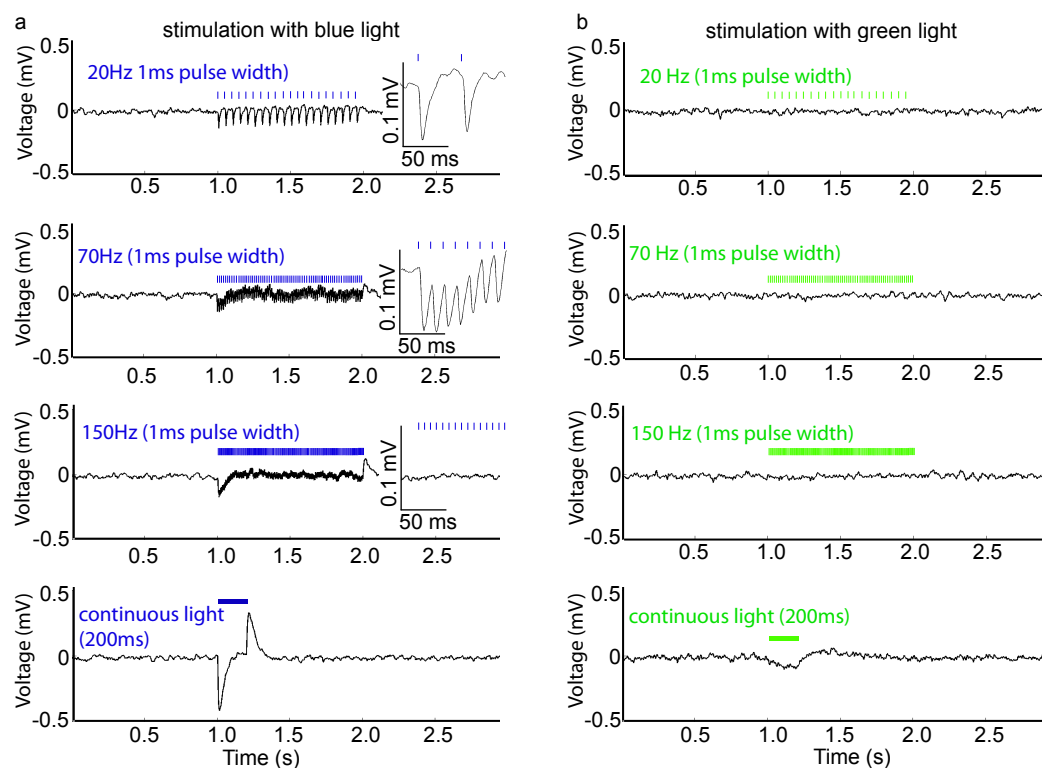

**Supplementary Figure 8.** Local field potential deflections in a ChR2-expressing regions during optical stimulation. **(a)** Local field potential deflections (averaged across 5 to 10 trials) in response to blue light with increasing frequencies from top to bottom (20, 70, 150 Hz and 200 ms continuous stimulation) at an AAV5-hThy-1-ChR2-EYFP injected site. Deflections are negative and show a positive rebound effect after the end of stimulation (particularly obvious for 200 ms continuous light). The deflections are in accordance with the expected ion flow:  $\text{Na}^+$  flows into the cells when blue light is present causing a relative decrease of positive charges (negative deflections of the LFP signal) in the extracellular milieu. Insets depict an expanded view of the averaged LFP traces. **(b)** Measurements during green light stimulation at the same area as in a. No prominent LFP deflections are visible. Insets depict an expanded view of the averaged LFP traces.

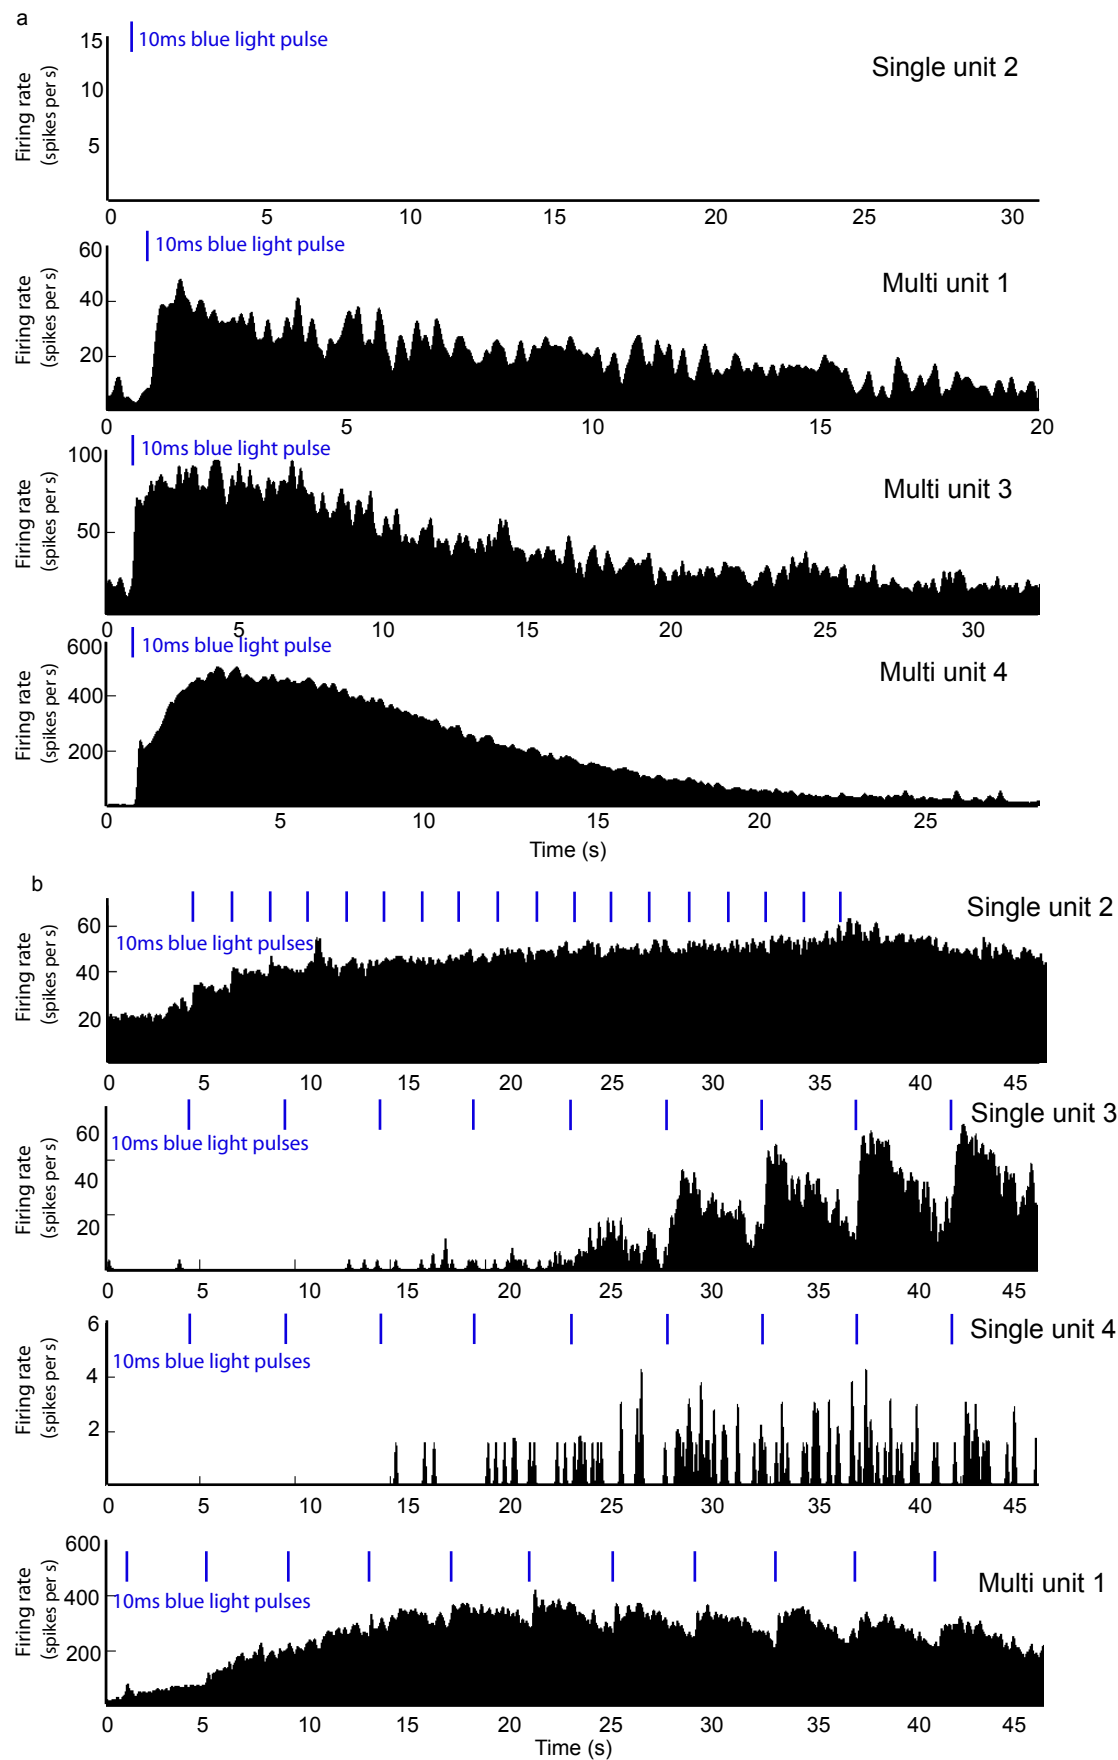

**Supplementary Figure 9.** Responses of single and multi units recorded at a SFO-EYFP expressing site. **(a)** Responses to a single 10 ms blue pulse. **(b)** Responses to a sequence of 10 ms blue pulses. We observed that two of those units responded only after 3 to 4 pulses demonstrating the accumulation of photons over multiple pulses. The putative mechanism for this is as follows: During the first light pulse, photons hit a subset of channels and open them. Since not all channels receive a photon this might not be sufficient to influence the spiking probability of a given neuron. Subsequent light pulses, however, deliver further photons that in a random fashion hit other channels and open them. Since SFO has a long lasting effect the channels opened during previous light pulses stay open. In this way the neuron eventually reaches an activation level that causes it to increase its spiking activity. This property of the SFO allows activations of large populations by a sequence of low light intensity pulses.

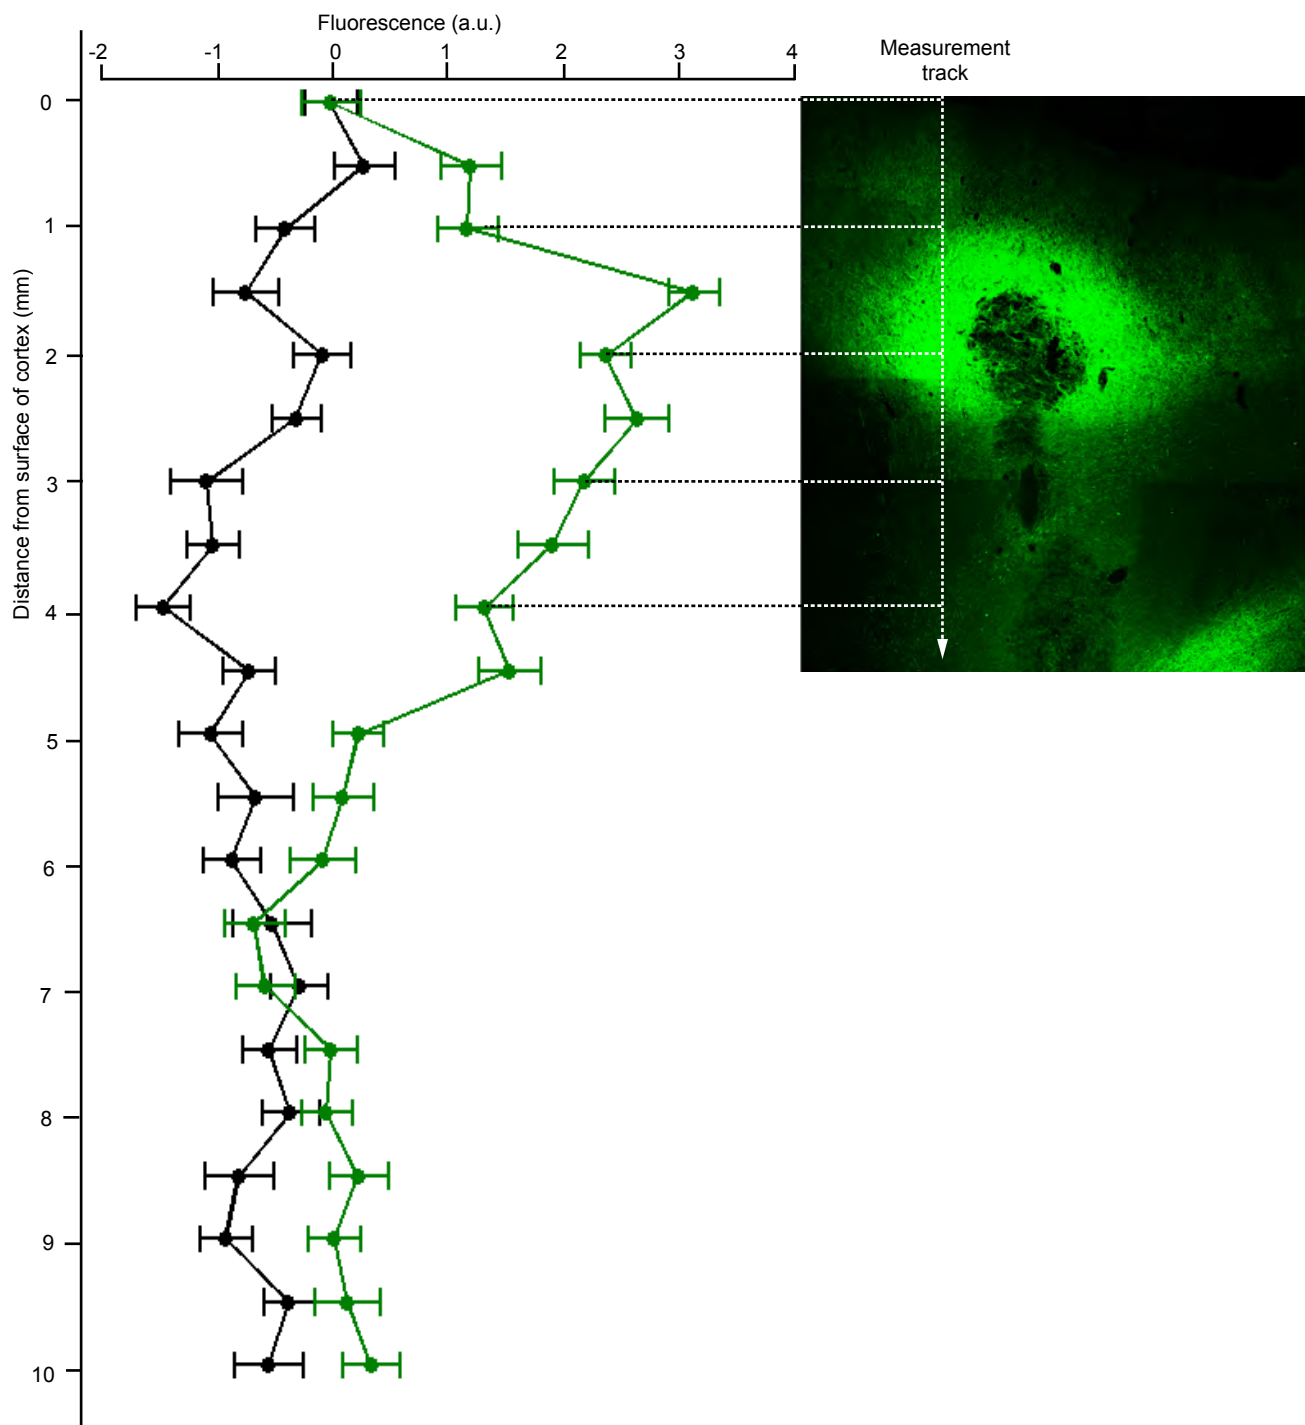

**Supplementary Figure 10.** Fluorescence measurements at injected and non-injected sites in the perfused brain. Image of injected and probed cortex (right) of monkey B and trace of fluorescence measurement (left, green curve, mean  $\pm$  SEM). The black curve represents measured values from visual cortex of the contralateral hemisphere (not injected with viral vectors and thus not expressing any fluorescent protein). Fluorescence intensities are plotted against penetration depth in cortex (distance between the surface of cortex and the tip of the fiber). The vertical dashed line indicates the measurement track and the horizontal dashed lines indicate depth of measurements in tissue. In contrast to quantified fluorescence at the injected site, there was no significant change measured in the control region of visual cortex. This confirms that fluorescence caused by the opsin-EYFP expression can be discriminated from auto-fluorescence in the primate brain.

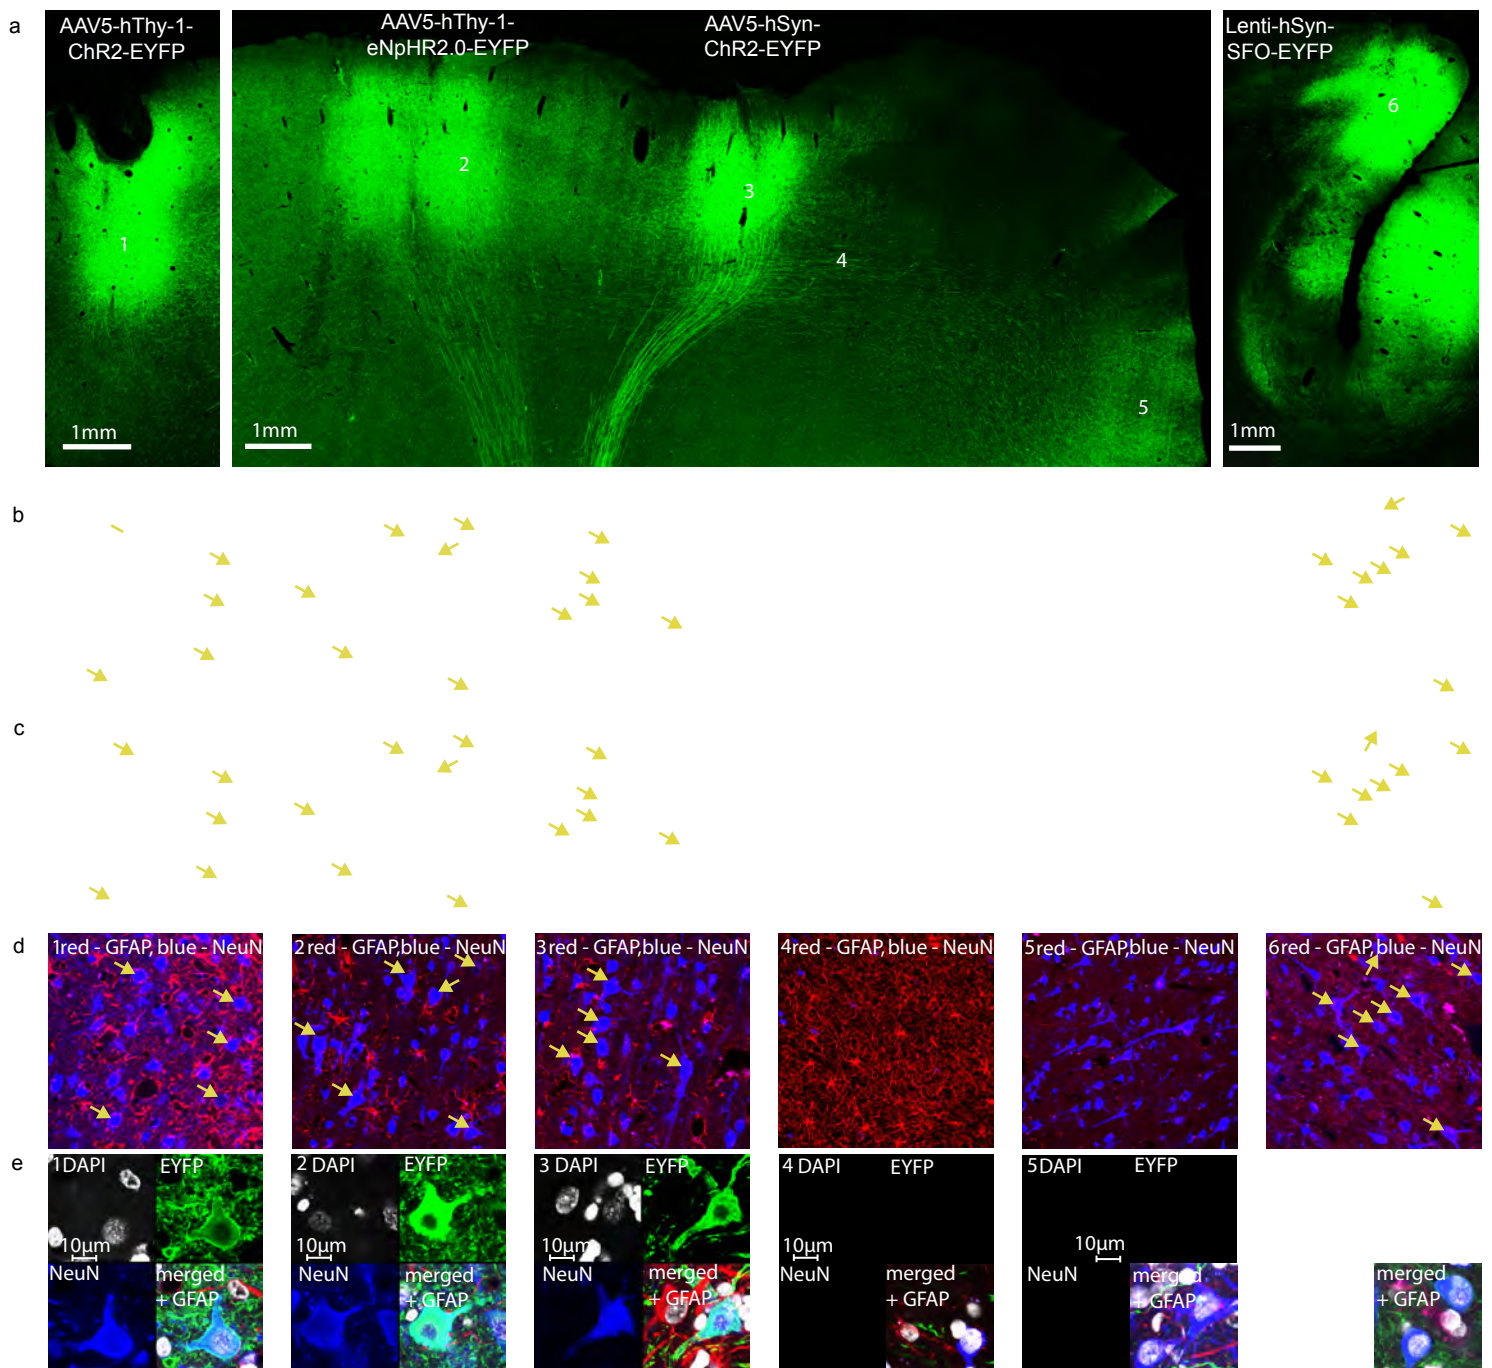

**Supplementary Figure 11.** Staining of neuronal and astroglia cells. **(a)** Coronal slice through motor cortex injected with AAV5-hThy-1-ChR2-EYFP in monkey D (left panel), coronal slice through motor cortex injected with AAV5-hThy-1-eNpHR2.0-EYFP and hSyn-ChR2-EYFP, respectively, in monkey D (middle panel), and sagittal slice through area PE injected with Lenti-hSyn-SFO-EYFP in monkey B (right panel). Same figure as in main manuscript Fig. 5a. **(b)** Magnified views of the injected areas (indicated by numbers 1,2,3, and 6) and areas receiving projecting fibers (4 and 5). Arrows point out single EYFP-opsin expressing neurons. **(c)** Counter stain with the nuclear marker DAPI (white to gray). **(d)** Counter stain with the neuronal marker NeuN (blue), and the astroglia marker GFAP (red). **(e)** Close-up view of infected neurons (1, 2, 3 and 6) and projecting fibers (4 and 5). Positions are indicated by the same numbers as used in the overview images.

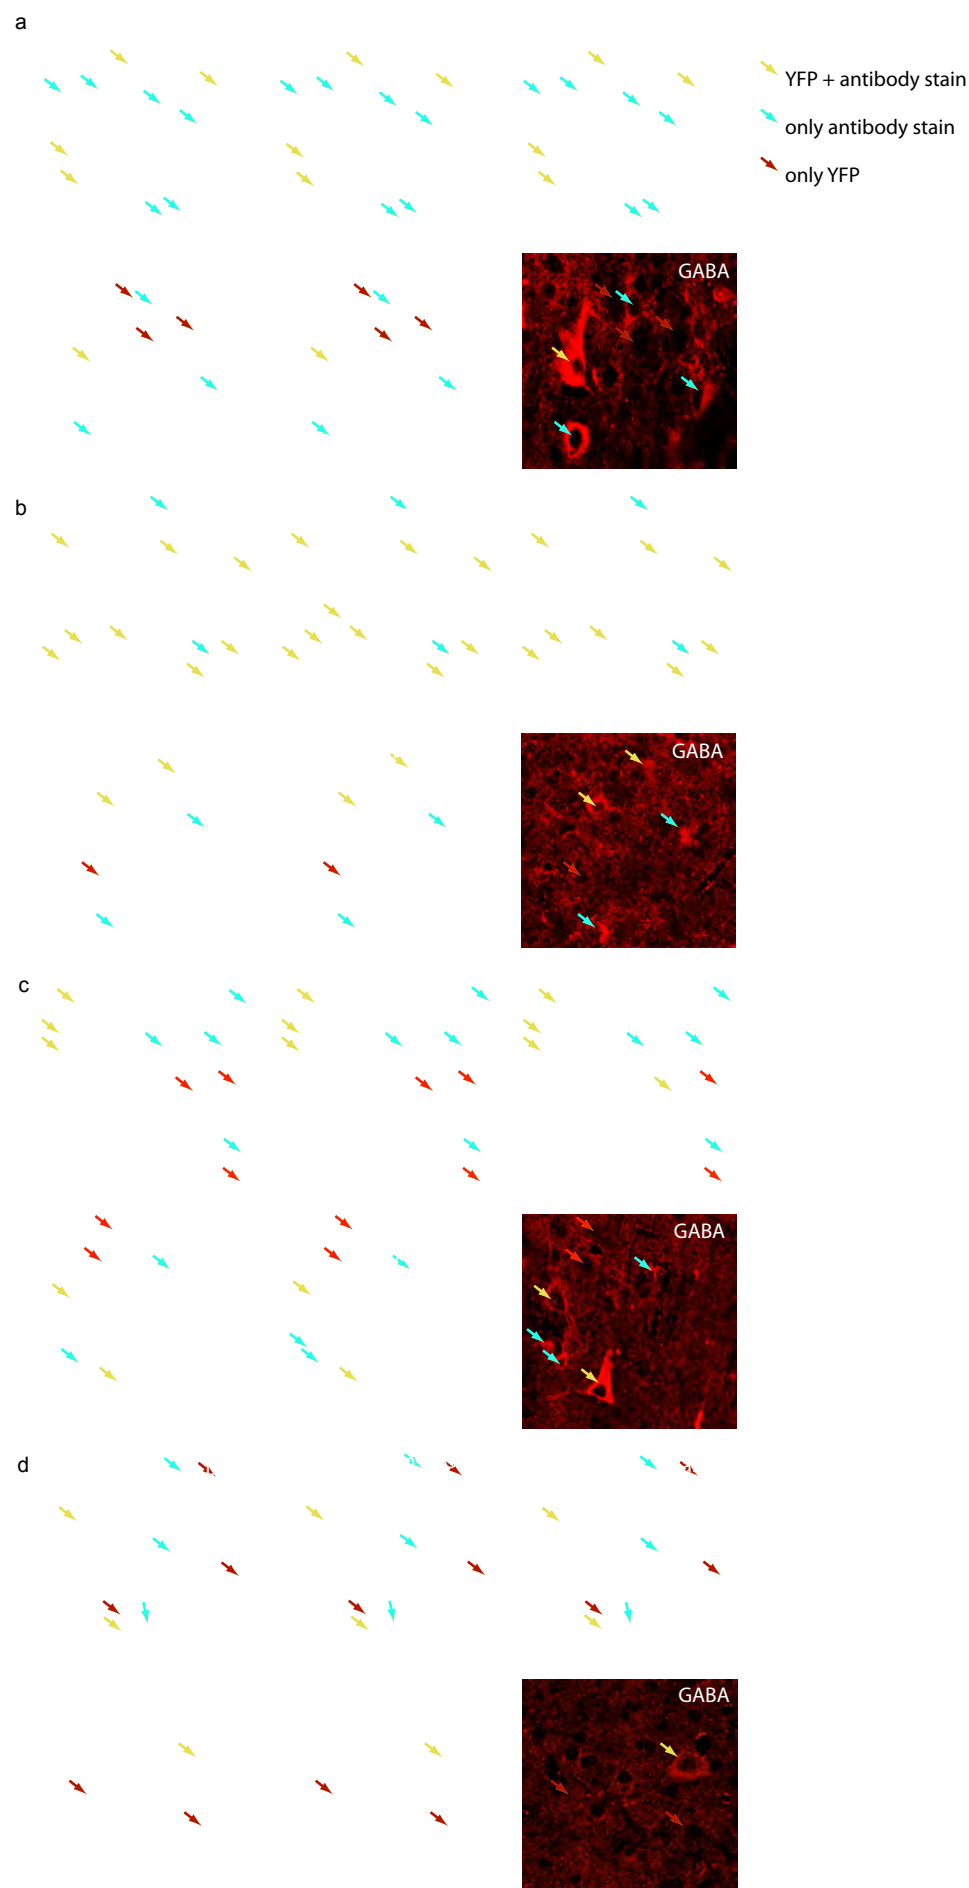

**Supplementary Figure 12.** Staining of inhibitory and excitatory neurons. (a) AAV5-hSyn-ChR2-EYFP, (b) AAV5-hThy-1-ChR2-EYFP, (c) AAV5-hThy-1-eNpHR2.0-EYFP, and (d) Lenti-hSyn-SFO-EYFP. Left panels illustrate nuclear stain (DAPI), middle panels show EYFP-opsin expression, and right panels show antibody stain for CamKII (blue) and GABA (red). Yellow arrows point towards neurons which express EYFP and are colabelled by the respective antibody.

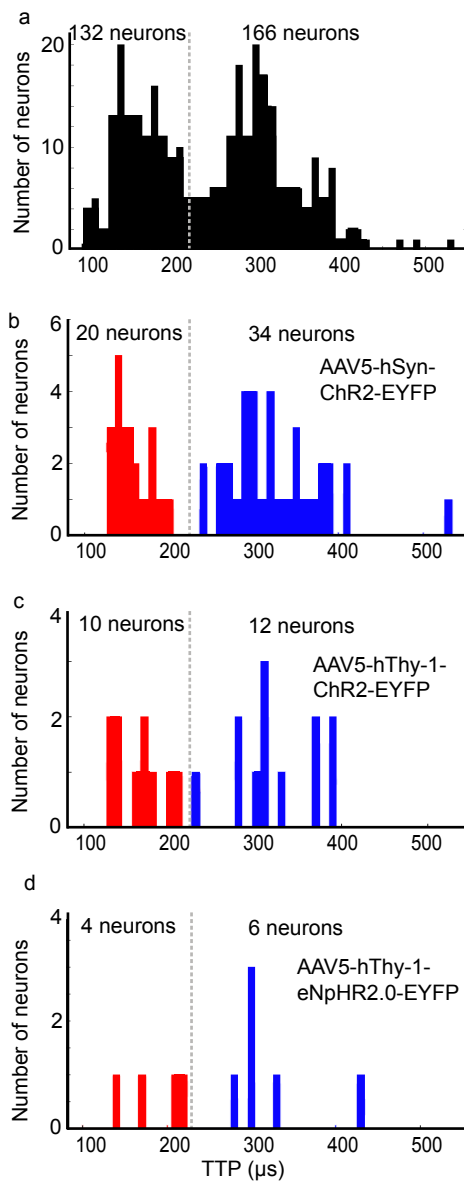

**Supplementary Figure 13.** Action potential waveform analysis. **(a)** Waveform width distribution measured as trough to peak (TTP) duration of waveforms of all recorded neurons. Gray dashed line represents 230  $\mu$ s threshold between narrow and broad waveforms. **(b)** Waveform width distribution of significantly light responsive hSyn-ChR2 neurons (red, narrow waveforms; blue, broad waveforms). **(c)** Waveform width distribution of significantly light responsive hThy-1-ChR2 neurons. **(d)** Waveform width distribution of significantly light responsive hThy-1-eNpHR2.0 neurons.

| construct            | monkey | Single units responsive to light | Multi units responsive to light |
|----------------------|--------|----------------------------------|---------------------------------|
| AAV5-hSyn-ChR2       | D      | 62/127 (50%)                     | 54/87 (62%)                     |
| AAV5-hThy-1-ChR2     | D      | 18/47 (38%)                      | 12/20 (60%)                     |
|                      | B      | 6/6 (100%)                       | 2/3 (67%)                       |
| AAV5-hThy-1-eNpHR2.0 | D      | 55/144 (38%)                     | 7/32 (22%)                      |
| Lenti-hSyn-SFO       | B      | 4/12 (33%)                       | 6/17 (26%)                      |

**Supplementary Table 1:** Summary of significantly light responsive neurons ( $p < 0.01$ ,  $X^2 = 3.8415$ , degrees of freedom = 1).

|        | AAV5-hSyn-ChR2-EYFP           |                                   | AAV5-hThy-1-ChR2-EYFP         |                                   | AAV5-hThy-1-eNpHR2.0-EYFP     |                                   |
|--------|-------------------------------|-----------------------------------|-------------------------------|-----------------------------------|-------------------------------|-----------------------------------|
|        | significant cells<br>(n = 62) | non-significant cells<br>(n = 65) | significant cells<br>(n = 18) | non-significant cells<br>(n = 29) | significant cells<br>(n = 55) | non-significant cells<br>(n = 89) |
| Mean   | 4.0234                        | 5.3087                            | 12.8562                       | 11.3054                           | 4.5608                        | 4.6565                            |
| Std    | 6.6148                        | 7.5348                            | 26.0445                       | 11.4881                           | 4.4108                        | 5.8260                            |
| Min    | 0.0440                        | 0.0484                            | 0                             | 0                                 | 0.01                          | 0.01                              |
| Max    | 34.4812                       | 41.2926                           | 145.6960                      | 38.2086                           | 16.8303                       | 28.9996                           |
| Median | 1.1254                        | 2.1942                            | 6.5151                        | 7.9051                            | 2.8026                        | 2.1686                            |

**Supplementary Table 2:** Baseline firing rates of motor cortex neurons at opsin expressing sites.

| Distance from cortical surface [μm] | AAV5-hSyn-ChR2-EYFP middle of injection (YFP/NeuN) | AAV5-hSyn-ChR2-EYFP border of injection (YFP/NeuN) | AAV5-hSyn-ChR2-EYFP out of border (YFP/NeuN) | AAV5-hSyn-ChR2-EYFP 1.5mm away from border (YFP/NeuN) | AAV5-hSyn-ChR2-EYFP 10mm away from border (YFP/NeuN) |
|-------------------------------------|----------------------------------------------------|----------------------------------------------------|----------------------------------------------|-------------------------------------------------------|------------------------------------------------------|
| 150                                 | 0/151 (0%)                                         | 2/245 (0.82%)                                      | 1/249 (0.4%)                                 | 0/228 (0%)                                            | 0/237 (0%)                                           |
| 450                                 | 10/132 (7.58%)                                     | 130/242 (53.72%)                                   | 3/185 (1.62%)                                | 0/217 (0%)                                            | 0/170 (0%)                                           |
| 750                                 | 111/168 (66.07%)                                   | 154/199 (77.39%)                                   | 0/198 (0%)                                   | 0/163 (0%)                                            | 0/150 (0%)                                           |
| 1050                                | 127/198 (64.14%)                                   | 188/246 (76.42%)                                   | 2/146 (1.37%)                                | 0/177 (0%)                                            | 1/177 (0.56%)                                        |
| 1350                                | 125/196 (63.78%)                                   | 140/202 (69.31%)                                   | 0/151 (0%)                                   | 0/115 (0%)                                            | 0/159 (0%)                                           |
| 1650                                | 140/224 (62.5%)                                    | 32/165 (19.39%)                                    | 0/86 (0%)                                    | 0/45 (0%)                                             | 0/166 (0%)                                           |
| 1950                                | 14/164 (8.54%)                                     | 1/141 (0.71%)                                      | 0/13 (0%)                                    | 0/24 (0%)                                             | 0/174 (0%)                                           |
| total                               | 527/1233(42.74%)                                   | 647/1440(44.93%)                                   | 6/1028 (0.58%)                               | 0/960 (0%)                                            | 1/1233(0.08%)                                        |
|                                     | 1174/2673 (43.92%)                                 |                                                    |                                              |                                                       |                                                      |

**Supplementary Table 3:** Efficiency of infection measured across cortical layers and at different distances from injection site (AAV5-hSyn-ChR2-EYFP). Number of neurons (visualized with a NeuN antibody stain - marker for all neurons) was compared to number of infected neurons (visualized by the fluorescent protein EYFP expressed by the neurons).

| Distance from cortical surface [μm] | AAV5-hThy-1-ChR2-EYFP middle of injection (YFP/NeuN) | AAV5- hThy-1-ChR2-EYFP border of injection (YFP/NeuN) | AAV5- hThy-1-ChR2-EYFP out of border (YFP/NeuN) |
|-------------------------------------|------------------------------------------------------|-------------------------------------------------------|-------------------------------------------------|
| 150                                 | 0/151 (0%)                                           | 0/148 (0%)                                            | 2/207 (1%)                                      |
| 450                                 | 10/133 (7.51%)                                       | 6/288 (2.08%)                                         | 1/156 (0.64%)                                   |
| 750                                 | 113/175 (64.57%)                                     | 66/128 (51.56%)                                       | 0/109 (0%)                                      |
| 1050                                | 136/219 (62.10%)                                     | 61/207 (29.47%)                                       | 0/111 (0%)                                      |
| 1350                                | 135/227 (59.47%)                                     | 8/155 (5.16%)                                         | 0/113 (0%)                                      |
| 1650                                | 111/191 (58.12%)                                     | 2/112 (1.79%)                                         | 0/120 (0%)                                      |
| 1950                                | 162/239 (67.78%)                                     | 0/104 (0%)                                            | 0/96 (0%)                                       |
| 2250                                | 56/160 (35%)                                         | 2/68 (2.94%)                                          | 0/100 (0%)                                      |
| 2550                                | 2/196 (1.02%)                                        | 0/56 (0%)                                             | 0/108 (0%)                                      |
| total                               | 725/1691(42.87%)                                     | 145/1266(11.45%)                                      | 3/1120(0.27%)                                   |
|                                     | 870/2957 (29.42%)                                    |                                                       |                                                 |

**Supplementary Table 4:** Efficiency of infection measured across cortical layers and at different distances from center of injection site (AAV5-hThy-1-ChR2-EYFP). Number of neurons (visualized with a NeuN antibody stain -marker for all neurons) was compared to number of infected neurons (visualized by the fluorescent protein EYFP expressed by the neurons).

| Distance from cortical surface [μm] | AAV5-hThy-1-eNpHR2.0-EYFP middle of injection (YFP/NeuN) | AAV5- hThy-1-eNpHR2.0 -EYFP border of injection (YFP/NeuN) | AAV5- hThy-1-eNpHR2.0 -EYFP out of border (YFP/NeuN) |
|-------------------------------------|----------------------------------------------------------|------------------------------------------------------------|------------------------------------------------------|
| 150                                 | 0/173 (0%)                                               | 0/201 (0%)                                                 | 0/217 (0%)                                           |
| 450                                 | 25/133 (18.80%)                                          | 2/191 (1.05%)                                              | 0/263 (0%)                                           |
| 750                                 | 90/143 (62.94%)                                          | 30/117 (25.64%)                                            | 2/139 (1.44%)                                        |
| 1050                                | 64/160 (40.00%)                                          | 36/127 (28.35%)                                            | 10/161 (6.21%)                                       |
| 1350                                | 95/147 (64.63%)                                          | 37/110 (33.64%)                                            | 15/145 (10.34%)                                      |
| 1650                                | 85/151 (56.129%)                                         | 55/110 (50.00%)                                            | 22/179 (12.29%)                                      |
| 1950                                | 63/121 (52.07%)                                          | 43/95 (45.26%)                                             | 17/175 (9.71%)                                       |
| 2250                                | 17/60 (28.33%)                                           | 21/45 (46.67%)                                             | 17/109 (15.60%)                                      |
| 2550                                | 9/33 (27.27%)                                            | 7/39 (17.95%)                                              | 1/65 (1.79%)                                         |
| total                               | 448/1121(39.96%)                                         | 231/1035(22.32%)                                           | 84/1453(5.78%)                                       |
|                                     | 679/2156(31.49%)                                         |                                                            |                                                      |

**Supplementary Table 5:** Efficiency of infection measured across cortical layers and at different distances from middle of injection site (AAV5-hThy-1-eNpHR2.0-EYFP). Number of neurons (visualized with a NeuN antibody stain -marker for all neurons) was compared to number of infected neurons (visualized by the fluorescent protein EYFP expressed by the neurons).

| Distance from cortical surface [μm] | Lenti-hSyn-SFO-EYFP middle of injection (YFP/NeuN) | Lenti-hSyn-SFO-EYFP border of injection (YFP/NeuN) | Lenti-hSyn-SFO-EYFP out of border (YFP/NeuN) |
|-------------------------------------|----------------------------------------------------|----------------------------------------------------|----------------------------------------------|
| 150                                 | 5/261 (1.92%)                                      | 10/293 (3.41%)                                     | 0/316 (0%)                                   |
| 450                                 | 86/282 (30.50%)                                    | 53/356 (14.89%)                                    | 2/250 (0.8%)                                 |
| 750                                 | 112/395 (28.35%)                                   | 42/322 (13.04%)                                    | 3/272 (1.10%)                                |
| 1050                                | 92/240 (38.33%)                                    | 10/123 (8.13%)                                     | 0/137 (0%)                                   |
| 1350                                | 70/236 (29.66%)                                    | 0/53 (0%)                                          | 0/37 (0%)                                    |
| 1650                                | 10/106 (9.43%)                                     |                                                    |                                              |
| total                               | 375/1520(24.67%)                                   | 115/1147(10.05%)                                   | 5/1012(0.49%)                                |
|                                     | 490/2667 (18.37%)                                  |                                                    |                                              |

**Supplementary Table 6:** Efficiency of infection measured across cortical layers and at different distances from middle of injection site (Lenti-hSyn-SFO-EYFP). Number of neurons (visualized with a NeuN antibody stain -marker for all neurons) was compared to number of infected neurons (visualized by the fluorescent protein EYFP expressed by the neurons).

|                      | CamKII single stain | GABA single stain |
|----------------------|---------------------|-------------------|
| AAV5-hSyn-ChR2       | 93/171 (54%)        | 22/153 (14%)      |
| AAV5-hThy-1-ChR2     | 141/219 (64%)       | 36/105 (34%)      |
| AAV5-hThy-1-eNpHR2.0 | 104/129 (81%)       | 24/115 (21%)      |
| Lenti-hSyn-SFO       | 125/229 (55%)       | 31/111 (28%)      |

**Supplementary Table 7:** Inhibitory and excitatory neuron stain. Stains were performed on separate brain slices, so values may not add to 100 %.

| construct            | Broad spiking | Narrow spiking | Not classified |
|----------------------|---------------|----------------|----------------|
| AAV5-hSyn-ChR2       | 34/54 (63%)   | 20/54 (37%)    | 8              |
| AAV5-hThy-1-ChR2     | 12/22 (55%)   | 10/22 (45%)    | 2              |
| AAV5-hThy-1-eNpHR2.0 | 6/10 (60%)    | 4/10 (40%)     | 45             |
| Lenti-hSyn-SFO       | 1/4 (25%)     | 3/4 (75%)      | 0              |

**Supplementary Table 8:** Action potential waveform analysis. Classification of waveforms into broad (putative excitatory) and narrow (putative inhibitory) spiking neurons.

| <b>equipment</b>              | <b>Specification/description</b>                                                                                                                     | <b>company</b>                                           | <b>Catalogue number</b>            |
|-------------------------------|------------------------------------------------------------------------------------------------------------------------------------------------------|----------------------------------------------------------|------------------------------------|
| optical fibers                | Diameter 200 $\mu$ m, NA 0.27<br>Patch Cord, Length: 3m, End A:<br>FC/PC, End B: Flat Cleave,<br>Furcation Tubing: FT030, (only<br>1" on FC/PC end)) | Thorlabs (Newton, NJ)                                    | BFL37-200-CUSTOM                   |
| electrodes                    | tungsten electrodes<br>78mm, 5-7M $\Omega$ at 1000Hz, 10 $\mu$ A                                                                                     | FHC (Bowdoin, ME)                                        | UEWLGCSEEN1E                       |
| superglue                     | Krazy Glue Advanced Precision<br>5g                                                                                                                  | Krazy Glue (Columbus,<br>OH)                             | TCL KG48348MR                      |
| blunt guide<br>tubes          | cut and smoothed 21G 1½<br>Needle                                                                                                                    | Becton, Dickinson and<br>Company (Franklin<br>Lakes, NJ) | 305167                             |
| hand driven<br>microdrive     | Ruffner microdrive dual<br>electrode                                                                                                                 | Crist Instrument Co Inc.<br>(Hagerstown, MD)             | 3-NRMD-S2                          |
| grid                          | Short grid standard delrin,<br>19.5 mm tall                                                                                                          | Crist Instrument Co Inc.<br>(Hagerstown, MD)             | 6-YGD-D1A                          |
| Power meter                   | Compact Power and Energy<br>Meter Console, Digital 4" LCD                                                                                            | Thorlabs (Newton, NJ)                                    | PM100D                             |
| Power sensor                  | Slim Power Sensor, Si, 400 -<br>1100 nm, 500 mW                                                                                                      | Thorlabs (Newton, NJ)                                    | S130C C-Series                     |
| Blue laser                    | 473 nm                                                                                                                                               | Sanctity Laser<br>Technology (Shanghai,<br>China)        | SVL-473-0100                       |
| Green laser                   | 561 nm                                                                                                                                               | CrystaLasers (Reno,<br>NV)                               | CL-2000                            |
| Yellow laser                  | 594 nm                                                                                                                                               | Laserglow Technologies<br>(Toronto, Ontario,<br>Canada)  | LRS-594-CFF-150-5                  |
| software for<br>laser control | TEMPO Experiment Control<br>System                                                                                                                   | Reflective Computing<br>(Saint Louis, MO)                | TEMPO Experiment<br>Control System |
| pulse<br>generator            | Master-8 pulse generator                                                                                                                             | A.M.P.I. (Jerusalem,<br>Israel)                          | Master-8                           |
| data<br>acquisition<br>system | Plexon data acquisition system:                                                                                                                      | Plexon (Dallas, TX)                                      |                                    |
|                               | recording software                                                                                                                                   |                                                          | RASPUTIN                           |
|                               | Plexon MAP system                                                                                                                                    |                                                          | MAP2001-036                        |
|                               | Preamplifier                                                                                                                                         |                                                          | PBX-077 2001                       |
|                               | Headstage                                                                                                                                            |                                                          | HST/8o50-G20                       |
|                               | 8-channel (10-pin) Omentics                                                                                                                          |                                                          | ADP/8o50-AMP-f-8                   |

|              |                                     |                     |                                     |
|--------------|-------------------------------------|---------------------|-------------------------------------|
|              | .050-to-female amphenol pin adaptor |                     |                                     |
| Spike sorter | Plexon Offline Sorter               | Plexon (Dallas, TX) | Plexon Offline Sorter Version 2.8.8 |

**Supplementary Table 9:** List of equipment for optical stimulation and neural recordings.

| equipment                                     | Specification/description                                                              | company                                                          | Catalogue number                              |
|-----------------------------------------------|----------------------------------------------------------------------------------------|------------------------------------------------------------------|-----------------------------------------------|
| Laser (Source 1) and laser driver             | 473nm                                                                                  | Laserglow Technologies (Toronto, Ontario, Canada)                | LRS-0473-AFM                                  |
| 3 Fiber splitters                             | fiber optic 1 X 2 splitter, 200um core, 50/50 ratio, ruggedized package, FC connectors | Fiber Optic Network Tech. Co. (Surrey, British Columbia, Canada) | customized                                    |
| 2 connectors between laser/detector and fiber | FC/FC connectors                                                                       | Thorlabs (Newton, NJ)                                            |                                               |
| Connector sleeves                             | FC/APC to FC/APC Mating Sleeves                                                        | Thorlabs (Newton, NJ)                                            | ADAF3                                         |
| DAQ system                                    | Data Acquisition System                                                                | NI (National Instruments)                                        | USB 6211                                      |
| Filter wheel                                  |                                                                                        | Thorlabs (Newton, NJ)                                            | (FW102B)                                      |
| Photodetector (sensitive)                     | low-noise detector; Cooled Avalanche Photodiode                                        | Hamamatsu (Hamamatsu City, Japan)                                | C4777-01 (APD)                                |
| Photodetector                                 | Detector                                                                               | Hamamatsu (Hamamatsu City, Japan)                                | C5460-01                                      |
| Triple Output DC Power Supply                 | Power supply                                                                           |                                                                  | BK Precision 1651A used at +5/G and +15/-15/G |
| DAQ card                                      | Data acquisition card                                                                  |                                                                  | NI USB 6211                                   |
| Control software                              | LabVIEW                                                                                | National Instruments Corp. (Austin, TX)                          |                                               |

**Supplementary Table 10:** List of components for in vivo fluorescence detector.
